# Supplementary material for: Genome wide transcriptome analysis reveals vital role of heat responsive genes in regulatory mechanisms of lentil (Lens culinaris Medikus)
Source: PubMed Central journal article supplement (PMC6736890; doi:10.1038/s41598-019-49496-0), 2019-09-10
Supplement: 41598_2019_49496_MOESM1_ESM.pdf [file 41598_2019_49496_MOESM1_ESM.pdf]

## Genome wide transcriptome analysis reveals vital role of heat responsive genes in regulatory mechanisms of lentil (*Lens culinaris* Medikus)

Dharmendra Singh<sup>1\*</sup>, Chandan Kumar Singh<sup>1</sup>, Jyoti Taunk<sup>1</sup>, Vasudha Singh<sup>1</sup>, Madan Pal<sup>2\*</sup> & Kishor Gaikwad<sup>3</sup>

<sup>1</sup>Division of Genetics, ICAR-Indian Agricultural Research Institute, New Delhi-110012

<sup>2</sup>Division of Plant Physiology, ICAR-Indian Agricultural Research Institute, New Delhi-110012

<sup>3</sup>ICAR-National Research Centre on Plant Biotechnology, Pusa Campus, New Delhi-110012

\*Corresponding authors emails: dharmendrapbg@rediffmail.com; madanpal@yahoo.com

**Additional file 1:** Fig. S1. Flow chart of samples used for extraction of RNA under control and heat stressed plants.

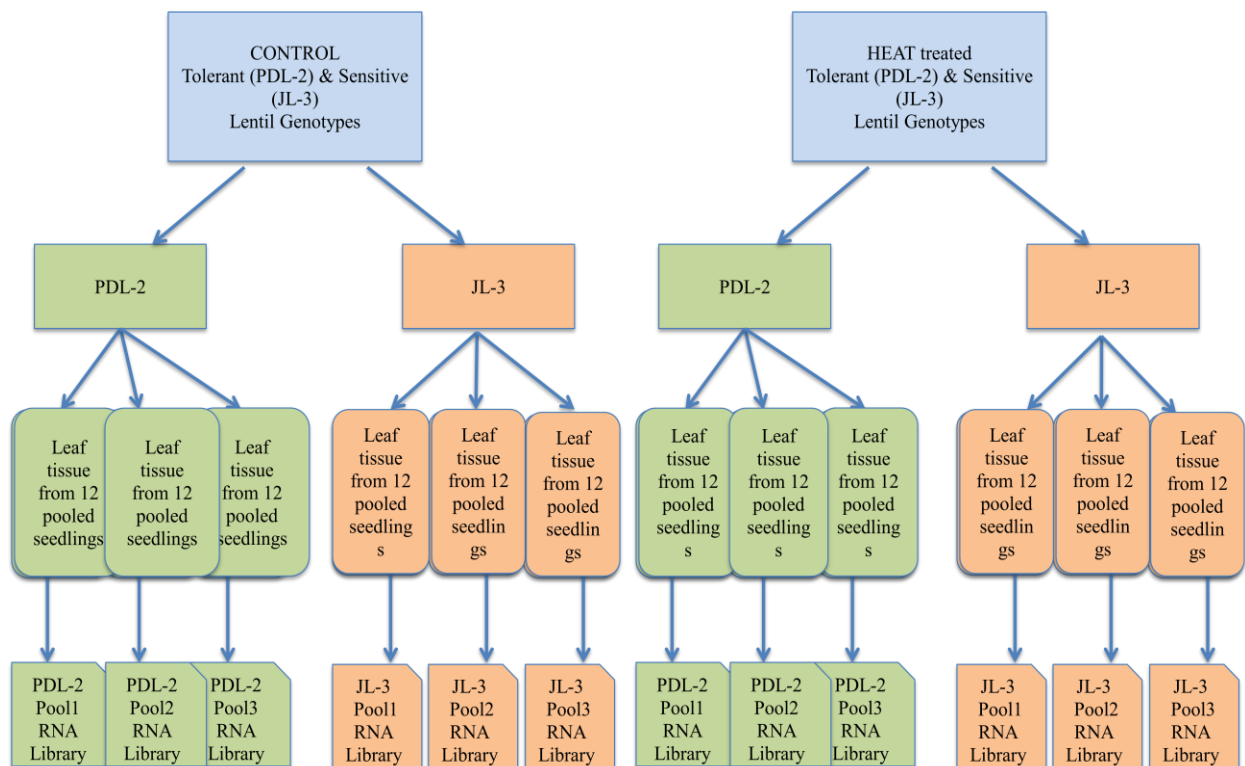

**Genome wide transcriptome analysis reveals vital role of heat responsive genes in regulatory mechanisms of lentil (*Lens culinaris* Medikus)**

Dharmendra Singh<sup>1\*</sup>, Chandan Kumar Singh<sup>1</sup>, Jyoti Taunk<sup>1</sup>, Vasudha Singh<sup>1</sup>, Madan Pal<sup>2\*</sup> & Kishor Gaikwad<sup>3</sup>

<sup>1</sup>Division of Genetics, ICAR-Indian Agricultural Research Institute, New Delhi-110012

<sup>2</sup>Division of Plant Physiology, ICAR-Indian Agricultural Research Institute, New Delhi-110012

<sup>3</sup>ICAR-National Research Centre on Plant Biotechnology, Pusa Campus, New Delhi-110012

\*Corresponding authors emails: dharmendrapbg@rediffmail.com; madanpal@yahoo.com

**Additional file 2.** Fig. S2 Flow chart representing work flow used for generation as well as annotation of contigs from different samples.

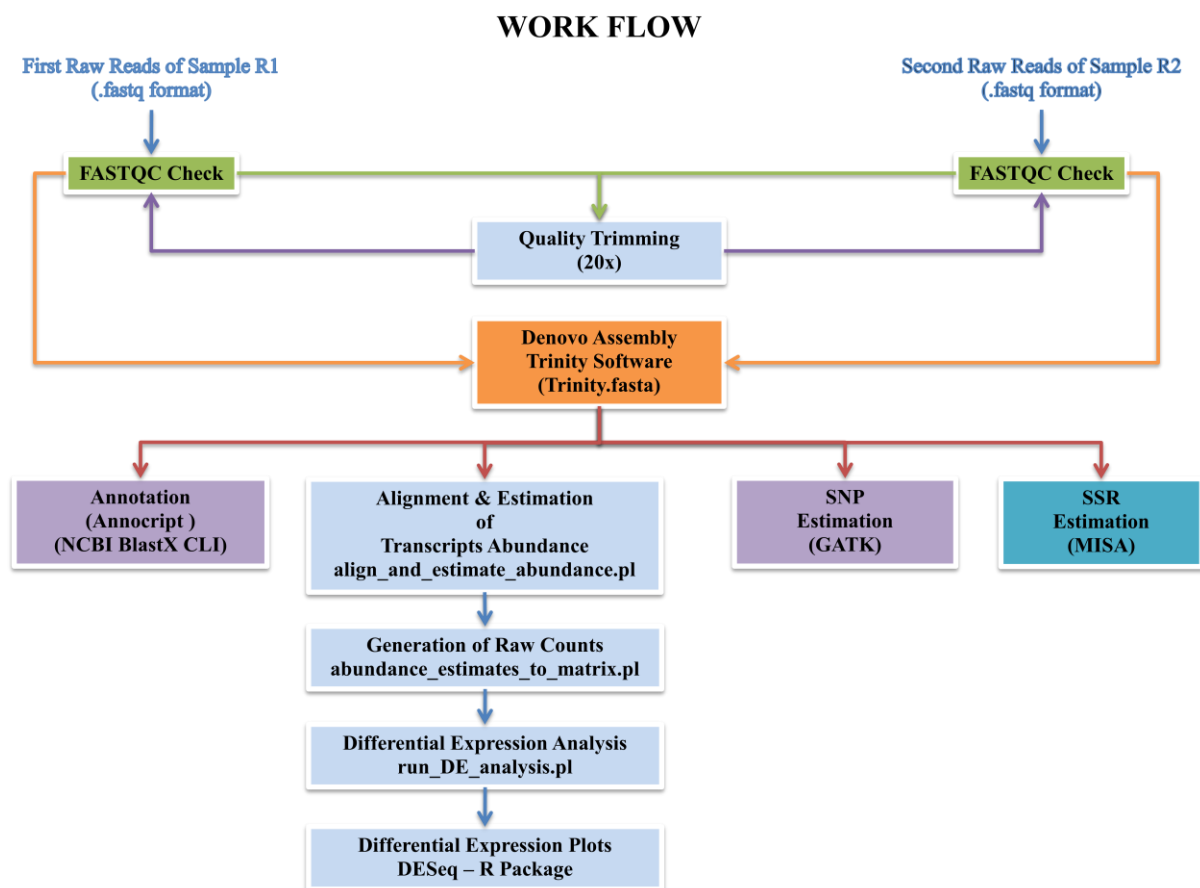

**Genome wide transcriptome analysis reveals vital role of heat responsive genes in regulatory mechanisms of lentil (*Lens culinaris* Medikus)**

Dharmendra Singh<sup>1\*</sup>, Chandan Kumar Singh<sup>1</sup>, Jyoti Taunk<sup>1</sup>, Vasudha Singh<sup>1</sup>, Madan Pal<sup>2\*</sup> & Kishor Gaikwad<sup>3</sup>

<sup>1</sup>Division of Genetics, ICAR-Indian Agricultural Research Institute, New Delhi-110012

<sup>2</sup>Division of Plant Physiology, ICAR-Indian Agricultural Research Institute, New Delhi-110012

<sup>3</sup>ICAR-National Research Centre on Plant Biotechnology, Pusa Campus, New Delhi-110012

\*Corresponding authors emails: dharmendrapbg@rediffmail.com; madanpal@yahoo.com

**Additional file 3:** Fig. S3. Heat score of PDL-2 (tolerant) and JL-3 (sensitive) under heat stress conditions.

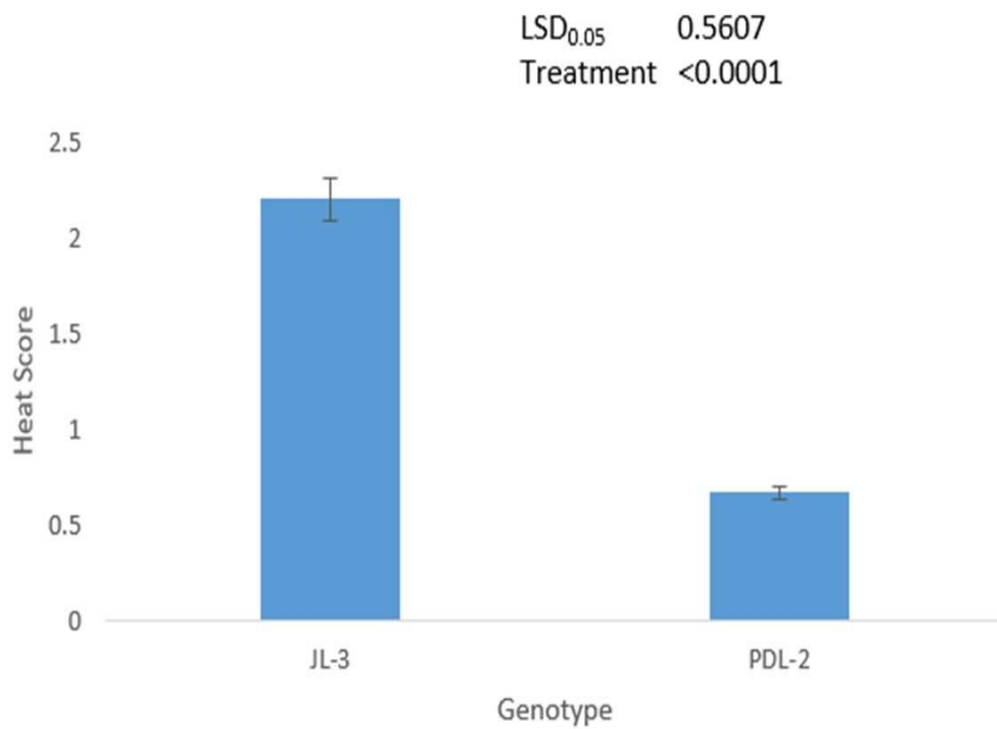

**Genome wide transcriptome analysis reveals vital role of heat responsive genes in regulatory mechanisms of lentil (*Lens culinaris* Medikus)**

Dharmendra Singh<sup>1\*</sup>, Chandan Kumar Singh<sup>1</sup>, Jyoti Taunk<sup>1</sup>, Vasudha Singh<sup>1</sup>, Madan Pal<sup>2\*</sup> & Kishor Gaikwad<sup>3</sup>

<sup>1</sup>Division of Genetics, ICAR-Indian Agricultural Research Institute, New Delhi-110012

<sup>2</sup>Division of Plant Physiology, ICAR-Indian Agricultural Research Institute, New Delhi-110012

<sup>3</sup>ICAR-National Research Centre on Plant Biotechnology, Pusa Campus, New Delhi-110012

\*Corresponding authors emails: dharmendrapbg@rediffmail.com; madanpal@yahoo.com

**Additional file 4:** Fig S4. *In vitro* pollen germination in PDL-2 (tolerant) and JL-3 (sensitive) genotypes under high temperature stress (35/20<sup>0</sup>C) and under controlled conditions.

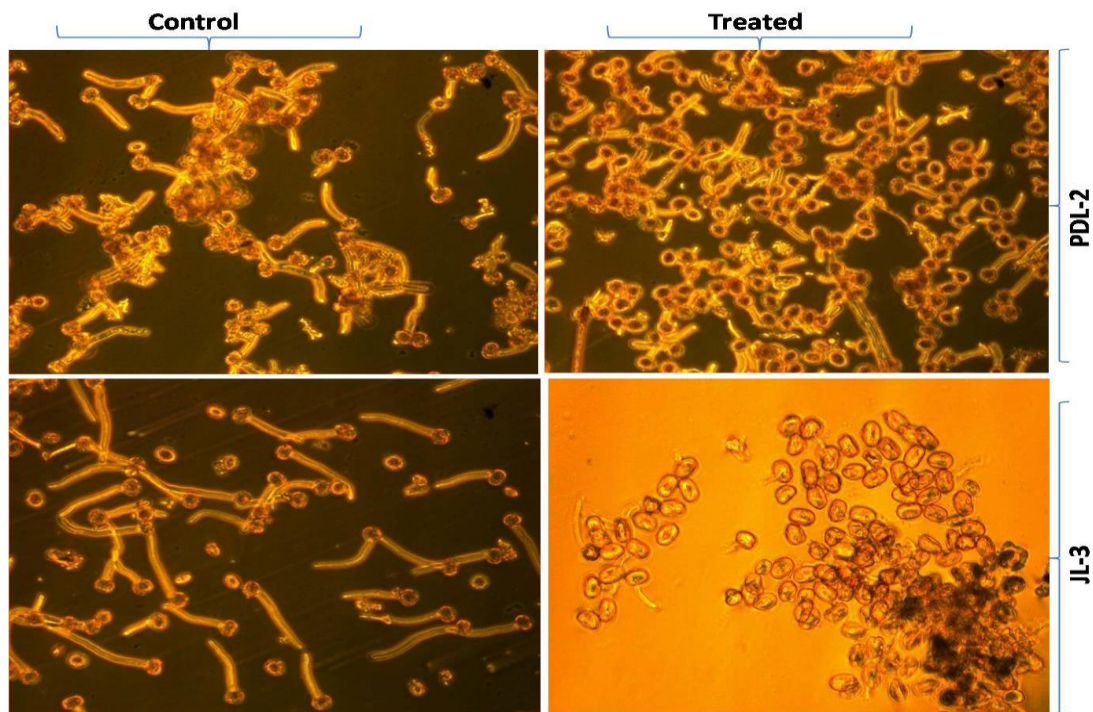

**Genome wide transcriptome analysis reveals vital role of heat responsive genes in regulatory mechanisms of lentil (*Lens culinaris* Medikus)**

Dharmendra Singh<sup>1\*</sup>, Chandan Kumar Singh<sup>1</sup>, Jyoti Taunk<sup>1</sup>, Vasudha Singh<sup>1</sup>, Madan Pal<sup>2\*</sup> & Kishor Gaikwad<sup>3</sup>

<sup>1</sup>Division of Genetics, ICAR-Indian Agricultural Research Institute, New Delhi-110012

<sup>2</sup>Division of Plant Physiology, ICAR-Indian Agricultural Research Institute, New Delhi-110012

<sup>3</sup>ICAR-National Research Centre on Plant Biotechnology, Pusa Campus, New Delhi-110012

\*Corresponding authors emails: dharmendrapbg@rediffmail.com; madanpal@yahoo.com

**Additional file 5:** Fig S5. Pollen germination of PDL-2 (tolerant) and JL-3 (sensitive) under controlled and heat stress conditions.

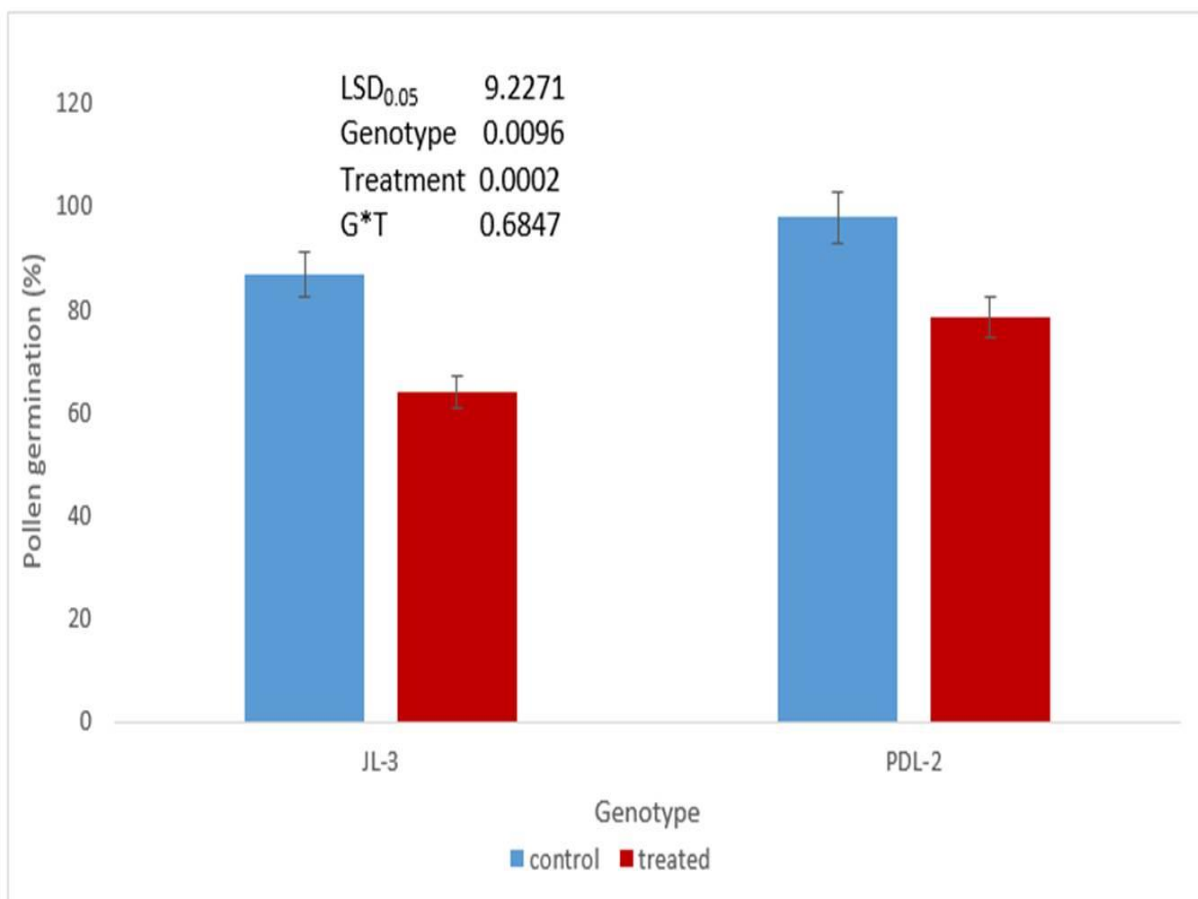

**Genome wide transcriptome analysis reveals vital role of heat responsive genes in regulatory mechanisms of lentil (*Lens culinaris* Medikus)**

Dharmendra Singh<sup>1\*</sup>, Chandan Kumar Singh<sup>1</sup>, Jyoti Taunk<sup>1</sup>, Vasudha Singh<sup>1</sup>, Madan Pal<sup>2\*</sup> & Kishor Gaikwad<sup>3</sup>

<sup>1</sup>Division of Genetics, ICAR-Indian Agricultural Research Institute, New Delhi-110012

<sup>2</sup>Division of Plant Physiology, ICAR-Indian Agricultural Research Institute, New Delhi-110012

<sup>3</sup>ICAR-National Research Centre on Plant Biotechnology, Pusa Campus, New Delhi-110012

\*Corresponding authors emails: dharmendrapbg@rediffmail.com; madanpal@yahoo.com

**Additional file 6.** Fig S6 Stressed stigma (35<sup>o</sup>C /20 <sup>o</sup>C) of sensitive genotype (JL-3) x stressed pollens (35<sup>o</sup>C /20<sup>o</sup>C) of tolerant genotype (PDL-2).

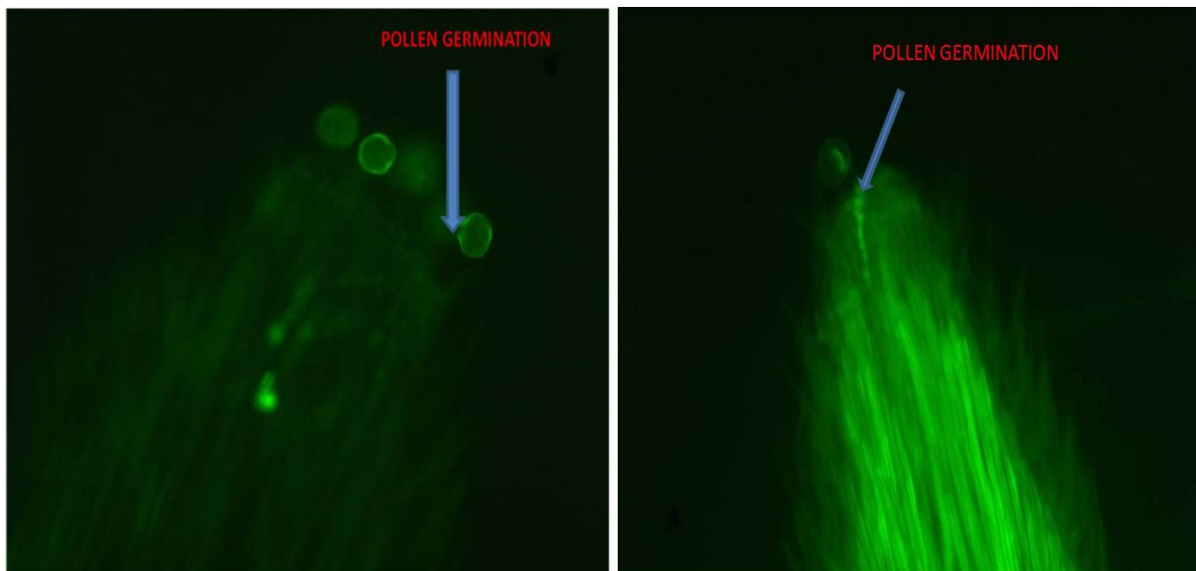

**Genome wide transcriptome analysis reveals vital role of heat responsive genes in regulatory mechanisms of lentil (*Lens culinaris* Medikus)**

Dharmendra Singh<sup>1\*</sup>, Chandan Kumar Singh<sup>1</sup>, Jyoti Taunk<sup>1</sup>, Vasudha Singh<sup>1</sup>, Madan Pal<sup>2\*</sup> & Kishor Gaikwad<sup>3</sup>

<sup>1</sup>Division of Genetics, ICAR-Indian Agricultural Research Institute, New Delhi-110012

<sup>2</sup>Division of Plant Physiology, ICAR-Indian Agricultural Research Institute, New Delhi-110012

<sup>3</sup>ICAR-National Research Centre on Plant Biotechnology, Pusa Campus, New Delhi-110012

\*Corresponding authors emails: dharmendrapbg@rediffmail.com; [madanpal@yahoo.com](mailto:madanpal@yahoo.com)

**Additional file 7.** Fig S7. Stressed stigma of tolerant genotype (PDL-2) x stressed pollens (35<sup>0</sup>C /20<sup>0</sup>C) of sensitive genotype (JL-3).

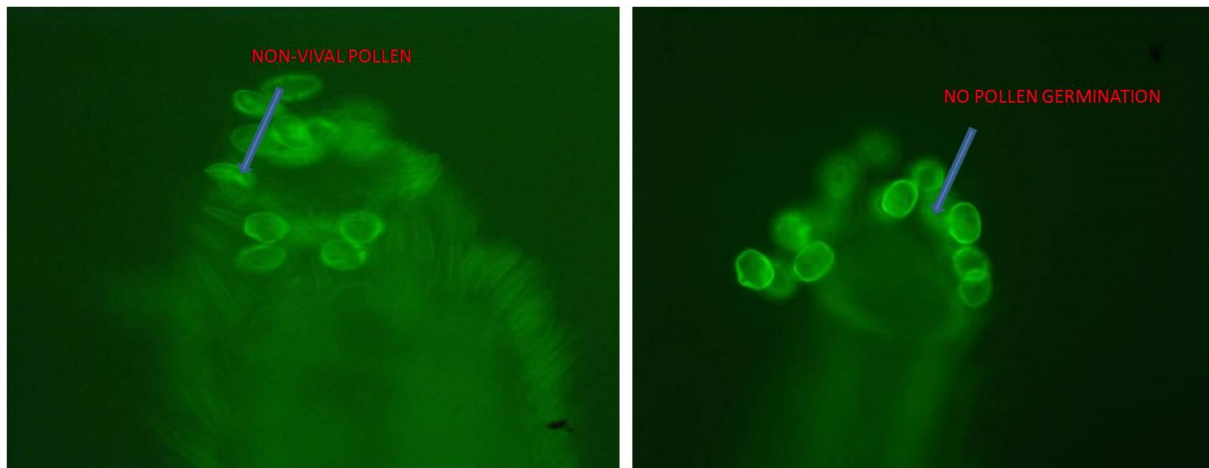

## Genome wide transcriptome analysis reveals vital role of heat responsive genes in regulatory mechanisms of lentil (*Lens culinaris* Medikus)

Dharmendra Singh<sup>1\*</sup>, Chandan Kumar Singh<sup>1</sup>, Jyoti Taunk<sup>1</sup>, Vasudha Singh<sup>1</sup>, Madan Pal<sup>2\*</sup> & Kishor Gaikwad<sup>3</sup>

<sup>1</sup>Division of Genetics, ICAR-Indian Agricultural Research Institute, New Delhi-110012

<sup>2</sup>Division of Plant Physiology, ICAR-Indian Agricultural Research Institute, New Delhi-110012

<sup>3</sup>ICAR-National Research Centre on Plant Biotechnology, Pusa Campus, New Delhi-110012

\*Corresponding authors emails: dharmendrapbg@rediffmail.com; [madanpal@yahoo.com](mailto:madanpal@yahoo.com)

**Additional file 8. Fig S8** Principal component (PCA) analysis between the samples and their replicates. It depicts overall similarity between replicates whereas; variability between the samples under different conditions was observed.

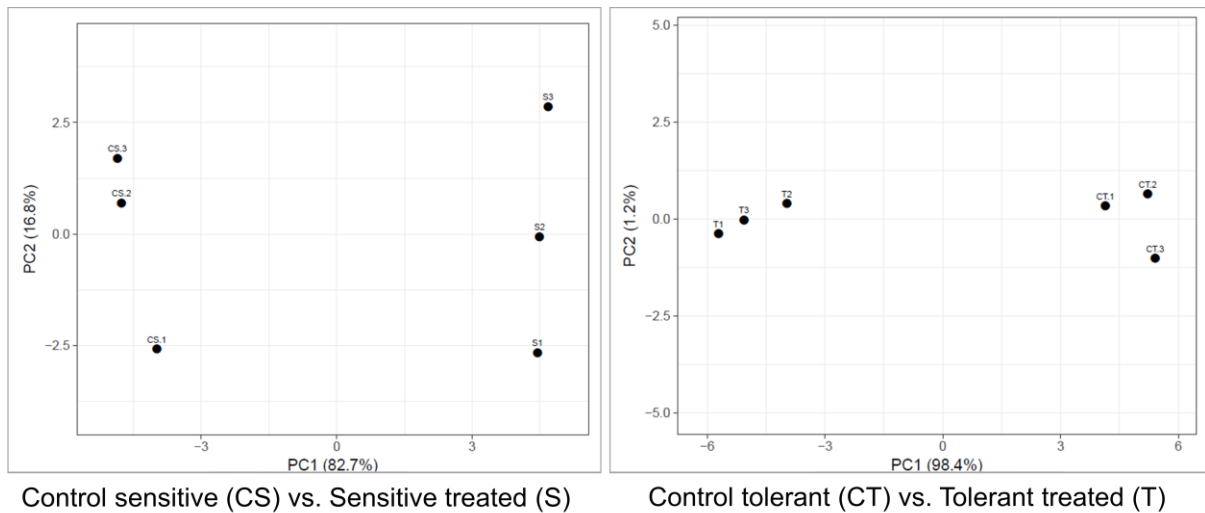



# Genome wide transcriptome analysis reveals vital role of heat responsive genes in regulatory mechanisms of lentil (*Lens culinaris* Medikus)

Dharmendra Singh<sup>1\*</sup>, Chandan Kumar Singh<sup>1</sup>, Jyoti Taunk<sup>1</sup>, Vasudha Singh<sup>1</sup>, Madan Pal<sup>2\*</sup> & Kishor Gaikwad<sup>3</sup>

<sup>1</sup>Division of Genetics, ICAR-Indian Agricultural Research Institute, New Delhi-110012

<sup>2</sup>Division of Plant Physiology, ICAR-Indian Agricultural Research Institute, New Delhi-110012

<sup>3</sup>ICAR-National Research Centre on Plant Biotechnology, Pusa Campus, New Delhi-110012

\*Corresponding authors emails: dharmendrapbg@rediffmail.com; madanpal@yahoo.com

**Additional file 9:** Fig. S9. HeatMap of top down regulated between samples with p value < 0.05 in Tolerant treated- Tolerant control.

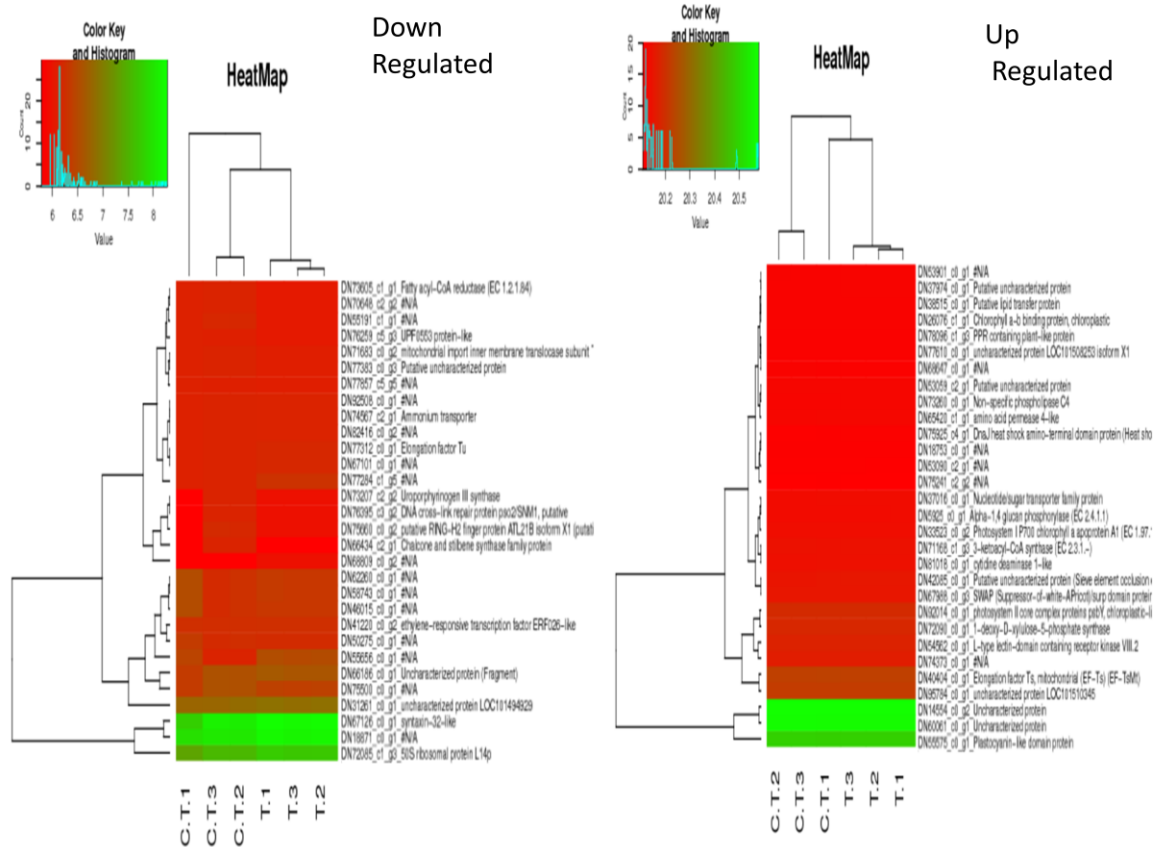

# Genome wide transcriptome analysis reveals vital role of heat responsive genes in regulatory mechanisms of lentil (*Lens culinaris* Medikus)

Dharmendra Singh<sup>1\*</sup>, Chandan Kumar Singh<sup>1</sup>, Jyoti Taunk<sup>1</sup>, Vasudha Singh<sup>1</sup>, Madan Pal<sup>2\*</sup> & Kishor Gaikwad<sup>3</sup>

<sup>1</sup>Division of Genetics, ICAR-Indian Agricultural Research Institute, New Delhi-110012

<sup>2</sup>Division of Plant Physiology, ICAR-Indian Agricultural Research Institute, New Delhi-110012

<sup>3</sup>ICAR-National Research Centre on Plant Biotechnology, Pusa Campus, New Delhi-110012

\*Corresponding authors emails: dharmendrapbg@rediffmail.com; madanpal@yahoo.com

**Additional file 10:** Fig. S10. HeatMap of top down and up regulated between samples with p value < 0.05 in sensitive treated- sensitive control.

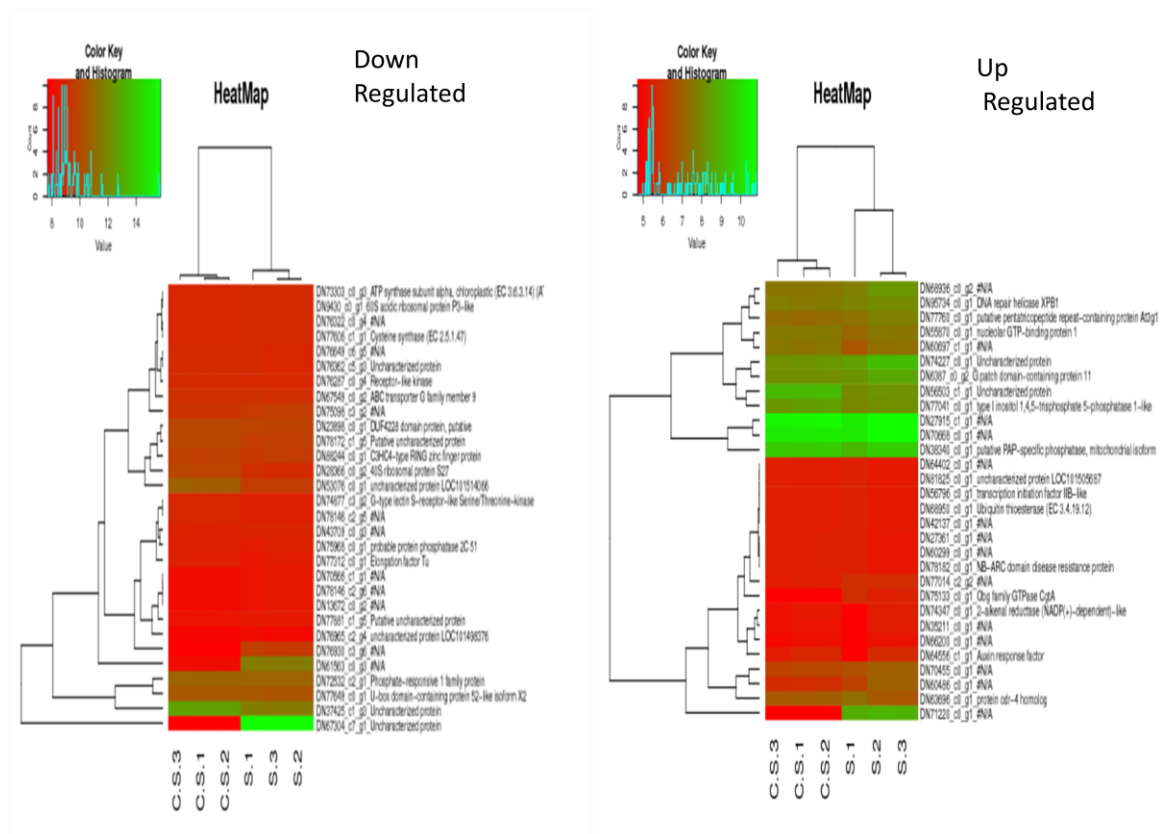

# Genome wide transcriptome analysis reveals vital role of heat responsive genes in regulatory mechanisms of lentil (*Lens culinaris* Medikus)

Dharmendra Singh<sup>1\*</sup>, Chandan Kumar Singh<sup>1</sup>, Jyoti Taunk<sup>1</sup>, Vasudha Singh<sup>1</sup>, Madan Pal<sup>2\*</sup> & Kishor Gaikwad<sup>3</sup>

<sup>1</sup>Division of Genetics, ICAR-Indian Agricultural Research Institute, New Delhi-110012

<sup>2</sup>Division of Plant Physiology, ICAR-Indian Agricultural Research Institute, New Delhi-110012

<sup>3</sup>ICAR-National Research Centre on Plant Biotechnology, Pusa Campus, New Delhi-110012

\*Corresponding authors emails: dharmendrapbg@rediffmail.com; madanpal@yahoo.com

**Additional file 11:** Fig. S11. Wego plot for GO terms for down regulated and up regulated transcripts in tolerant treated- tolerant control.

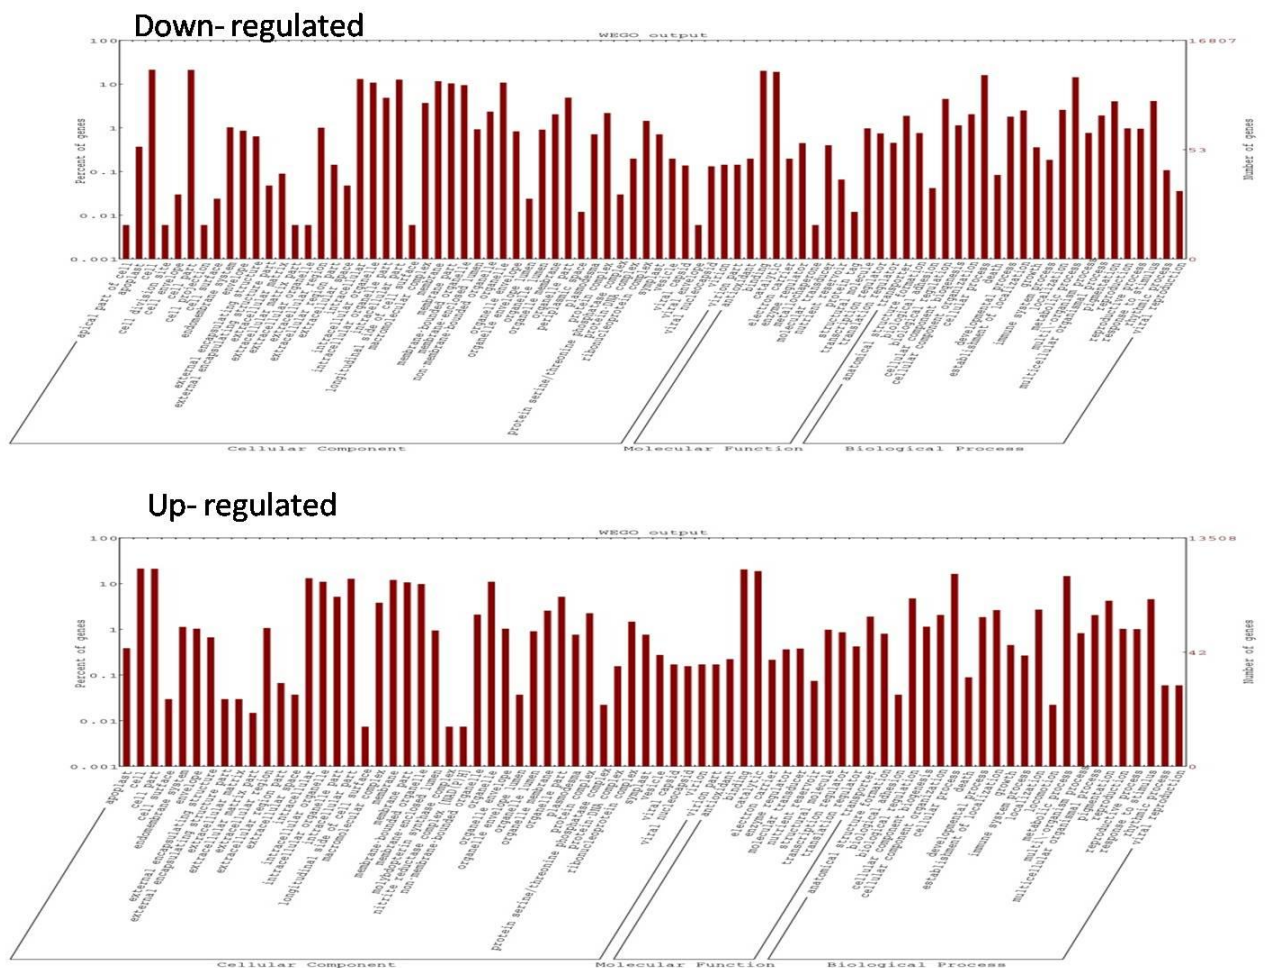



**Genome wide transcriptome analysis reveals vital role of heat responsive genes in regulatory mechanisms of lentil (*Lens culinaris* Medikus)**

Dharmendra Singh<sup>1\*</sup>, Chandan Kumar Singh<sup>1</sup>, Jyoti Taunk<sup>1</sup>, Vasudha Singh<sup>1</sup>, Madan Pal<sup>2\*</sup> & Kishor Gaikwad<sup>3</sup>

<sup>1</sup>Division of Genetics, ICAR-Indian Agricultural Research Institute, New Delhi-110012

<sup>2</sup>Division of Plant Physiology, ICAR-Indian Agricultural Research Institute, New Delhi-110012

<sup>3</sup>ICAR-National Research Centre on Plant Biotechnology, Pusa Campus, New Delhi-110012

\*Corresponding authors emails: dharmendrapbg@rediffmail.com; madanpal@yahoo.com

**Additional file 13:** Fig. S13. MapMan display for tolerant treated- tolerant control, under heat stress. Up regulated genes are expressed in increased intense red while down regulated as blue at the amplitude of 4.5 to -4.5 (log<sub>2</sub>-value).

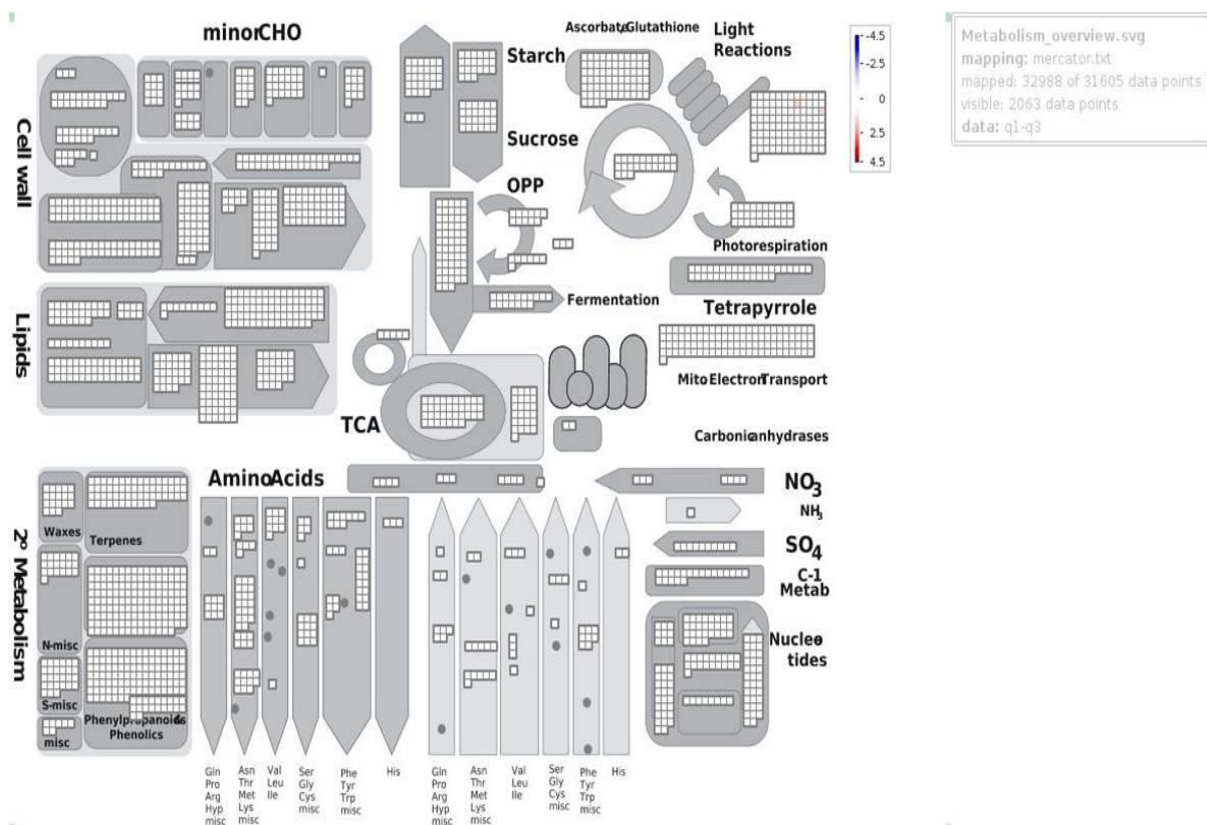

**Genome wide transcriptome analysis reveals vital role of heat responsive genes in regulatory mechanisms of lentil (*Lens culinaris* Medikus)**

Dharmendra Singh<sup>1\*</sup>, Chandan Kumar Singh<sup>1</sup>, Jyoti Taunk<sup>1</sup>, Vasudha Singh<sup>1</sup>, Madan Pal<sup>2\*</sup> & Kishor Gaikwad<sup>3</sup>

<sup>1</sup>Division of Genetics, ICAR-Indian Agricultural Research Institute, New Delhi-110012

<sup>2</sup>Division of Plant Physiology, ICAR-Indian Agricultural Research Institute, New Delhi-110012

<sup>3</sup>ICAR-National Research Centre on Plant Biotechnology, Pusa Campus, New Delhi-110012

\*Corresponding authors emails: dharmendrapbg@rediffmail.com; madanpal@yahoo.com

**Additional file 14:** Fig. S14: MapMan display for sensitive treated- sensitive control, under heat stress. Up regulated genes are expressed in increased intense red while down regulated as blue at the amplitude of 4.5 to -4.5 (log<sub>2</sub>-value).

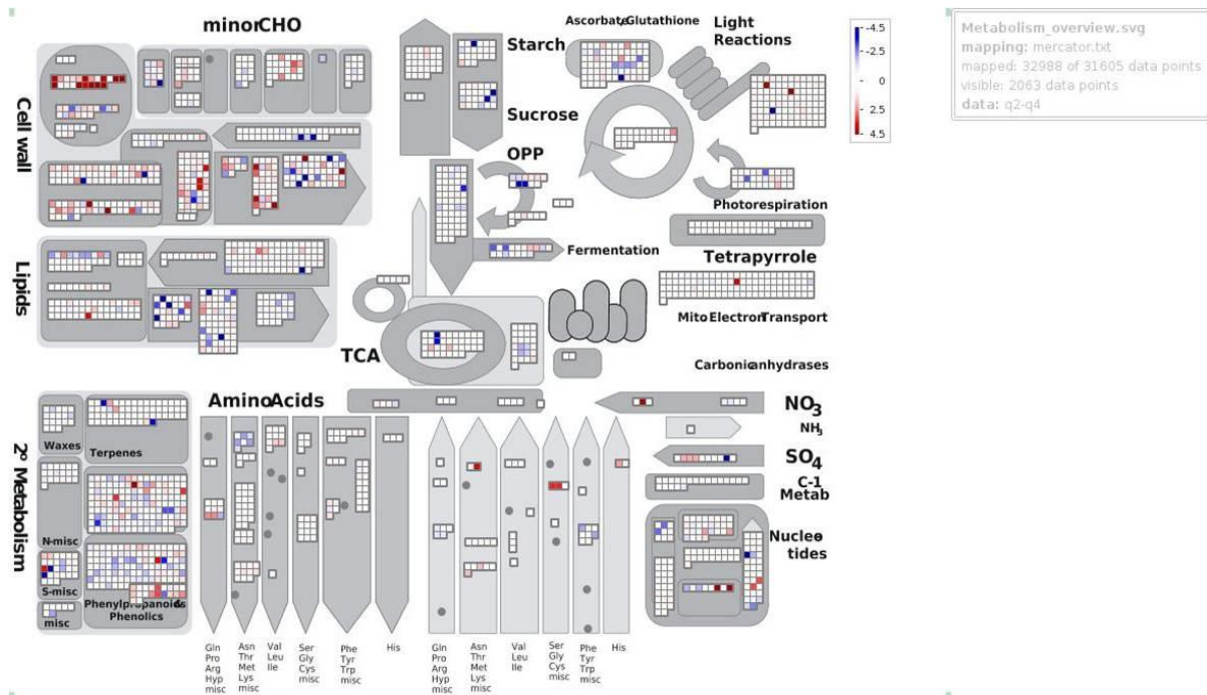



**Genome wide transcriptome analysis reveals vital role of heat responsive genes in regulatory mechanisms of lentil (*Lens culinaris* Medikus)**

Dharmendra Singh<sup>1\*</sup>, Chandan Kumar Singh<sup>1</sup>, Jyoti Taunk<sup>1</sup>, Vasudha Singh<sup>1</sup>, Madan Pal<sup>2\*</sup> & Kishor Gaikwad<sup>3</sup>

<sup>1</sup>Division of Genetics, ICAR-Indian Agricultural Research Institute, New Delhi-110012

<sup>2</sup>Division of Plant Physiology, ICAR-Indian Agricultural Research Institute, New Delhi-110012

<sup>3</sup>ICAR-National Research Centre on Plant Biotechnology, Pusa Campus, New Delhi-110012

\*Corresponding authors emails: dharmendrapbg@rediffmail.com; madanpal@yahoo.com

**Additional file 15:** Fig. S15. Representative gel picture of Primer-10 (polymorphic SSR) on diverse genotypes.

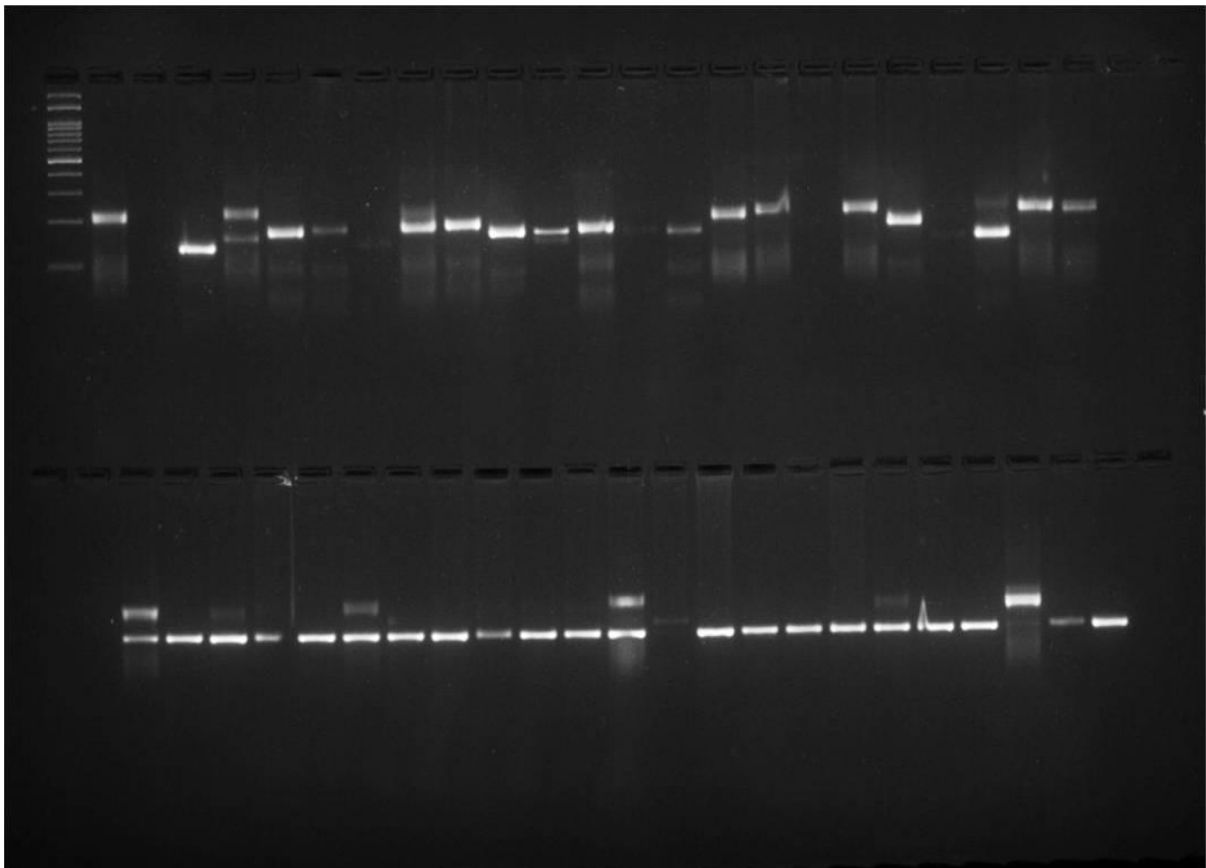

| S. No. | Genotype   | Origin     | Type  | S. No. | Genotype  | Origin    | Type |
|--------|------------|------------|-------|--------|-----------|-----------|------|
| 1      | BM-4       | Bangladesh | Cult. | 49     | ILL-385   | MEXICO    | GC   |
| 2      | DPL-62     | India      | Cult. | 50     | ILL-590   | Turkey    | GC   |
| 3      | HUM-57     | India      | GC    | 51     | ILL-7979  | ICARDA    | GC   |
| 4      | FLIP-96-51 | ICARDA     | GC    | 52     | ILL-7982  | ICARDA    | GC   |
| 5      | IG-109039  | ICARDA     | GC    | 53     | ILL-91887 | ICARDA    | GC   |
| 6      | IG-111991  | ICARDA     | LR    | 54     | ILL-9841  | ICARDA    | GC   |
| 7      | IG-112078  | ICARDA     | LR    | 55     | ILL-9900  | ICARDA    | GC   |
| 8      | IG-11210   | ICARDA     | LR    | 56     | ILL-9916  | ICARDA    | GC   |
| 9      | IG-112128  | ICARDA     | LR    | 57     | ILL-9941  | ICARDA    | GC   |
| 10     | IG-112131  | ICARDA     | LR    | 58     | ILL-9960  | ICARDA    | GC   |
| 11     | IG-112137  | ICARDA     | LR    | 59     | ILWL-06   | Turkey    | Wild |
| 12     | IG-116551  | ICARDA     | LR    | 60     | ILWL-100  | Turkey    | Wild |
| 13     | IG-129185  | ICARDA     | LR    | 61     | ILWL-142  | Syria     | Wild |
| 14     | IG-129214  | ICARDA     | LR    | 62     | ILWL-165  | Syria     | Wild |
| 15     | IG-129287  | ICARDA     | LR    | 63     | ILWL-20   | Palestine | Wild |
| 16     | IG-129309  | ICARDA     | LR    | 64     | ILWL-203  | Turkey    | Wild |
| 17     | IG-129315  | ICARDA     | LR    | 65     | ILWL-23   | Italy     | Wild |
| 18     | IG-12970   | ICARDA     | LR    | 66     | ILWL-29   | Spain     | Wild |
| 19     | IG-130219  | ICARDA     | LR    | 67     | ILWL-314  | Turkey    | Wild |
| 20     | IG-130272  | ICARDA     | LR    | 68     | ILWL-340  | Jordan    | Wild |
| 21     | IG-136607  | ICARDA     | LR    | 69     | ILWL-350  | Syria     | Wild |

Additional File  
16. Table S1.  
List of 96  
genotypes used  
in validation of  
55 g- SSRs.



|    |           |        |      |    |             |         |       |
|----|-----------|--------|------|----|-------------|---------|-------|
| 22 | IG-136608 | -      | Wild | 70 | ILWL-357    | Syria   | Wild  |
| 23 | IG-136612 | Turkey | Wild | 71 | ILWL-398(A) | Lebanon | Wild  |
| 24 | IG-136637 | France | Wild | 72 | ILWL-415    | Syria   | Wild  |
| 25 | IG-136653 | Israel | Wild | 73 | ILWL-418    | Syria   | Wild  |
| 26 | IG-149    | ICARDA | LR   | 74 | ILWL-437    | Turkey  | Wild  |
| 27 | IG-69549  | ICARDA | LR   | 75 | ILWL-447    | Turkey  | Wild  |
| 28 | IG-71630  | ICARDA | LR   | 76 | ILWL-55(2)  | Israel  | Wild  |
| 29 | IG-73717  | ICARDA | LR   | 77 | ILWL-468    | -       | wild  |
| 30 | IG-73802  | ICARDA | LR   | 78 | IPL-406     | India   | Cult. |
| 31 | IG-73945  | ICARDA | LR   | 79 | JL-3        | India   | Cult. |
| 32 | IG-75920  | ICARDA | LR   | 80 | L-4602      | India   | BL    |
| 33 | ILL-10031 | ICARDA | GC   | 81 | L-7903      | India   | BL    |
| 34 | ILL-10032 | ICARDA | GC   | 82 | LC-282-896  | India   | BL    |
| 35 | ILL-10040 | ICARDA | GC   | 83 | LC-284-116  | India   | BL    |
| 36 | ILL-10063 | ICARDA | GC   | 84 | LC-289-1447 | India   | BL    |
| 37 | ILL-10074 | ICARDA | GC   | 85 | LC-292-1544 | India   | BL    |
| 38 | ILL-10075 | ICARDA | GC   | 86 | LC-292-997  | India   | BL    |
| 39 | ILL-10082 | ICARDA | GC   | 87 | LC-300-11   | India   | BL    |
| 40 | ILL-10133 | ICARDA | GC   | 88 | LC-300-12   | India   | BL    |
| 41 | ILL-10234 | ICARDA | GC   | 89 | LC-300-13   | India   | BL    |
| 42 | ILL-10266 | ICARDA | GC   | 90 | LC-300-8    | India   | BL    |
| 43 | ILL-10270 | ICARDA | GC   | 91 | LC-300-9    | India   | BL    |
| 44 | ILL-10671 | -      | GC   | 92 | LC-74-1-51  | India   | BL    |
| 45 | ILL-10809 | ICARDA | GC   | 93 | PDL-1       | ICARDA  | BL    |
| 46 | ILL-10826 | ICARDA | GC   | 94 | PDL-2       | ICARDA  | BL    |
| 47 | ILL-10897 | ICARDA | GC   | 95 | PSL-9       | India   | BL    |
| 48 | ILL-10951 | ICARDA | GC   | 96 | WBL-77      | India   | Cult. |

Germplasm collection = GC, Breeding Line = BL, Cultivar = Cult., Landrace = LR,

Additional File 17. Table 2: List of 55 g-SSRs developed for validation in 96 genotypes.

| Primer No. | Seq ID                    | Orientation | tm    | GC%   | Seq                   |
|------------|---------------------------|-------------|-------|-------|-----------------------|
| Primer-1   | TRINITY_DN52494_c0_g1_i1  | FORWARD     | 54.84 | 38.1  | TGGACTTTAAGCATGATAAGC |
|            | TRINITY_DN52494_c0_g1_i1  | REVERSE     | 54.94 | 38.1  | ACTTTGCCTTCCCTTCTATTA |
| Primer-2   | TRINITY_DN17284_c2_g2_i1  | FORWARD     | 54.95 | 47.62 | GGCATTCTCAGTCACATAGAG |
|            | TRINITY_DN17284_c2_g2_i1  | REVERSE     | 55.27 | 38.1  | TGTTATCATATGCCGATCTTC |
| Primer-3   | TRINITY_DN17275_c0_g1_i1  | FORWARD     | 55.24 | 38.1  | CTAGACAATGTCCAAAATCCA |
|            | TRINITY_DN17275_c0_g1_i1  | REVERSE     | 55.06 | 33.33 | AATTGTGACAAATCATCAAGG |
| Primer-4   | TRINITY_DN52494_c0_g1_i1  | FORWARD     | 54.89 | 33.33 | TCCTTTCTTTTGATGACCATA |
|            | TRINITY_DN52494_c0_g1_i1  | REVERSE     | 54.62 | 38.1  | TATGTTTTCTGATGCTTCTTC |
| Primer-5   | TRINITY_DN52424_c0_g1_i1  | FORWARD     | 55.51 | 47.62 | GGACGGACTTTTGTATAGGAG |
|            | TRINITY_DN52424_c0_g1_i1  | REVERSE     | 55.12 | 47.62 | ATAGTTGGATCCTGCTCTCTC |
| Primer-6   | TRINITY_DN17275_c1_g1_i5  | FORWARD     | 54.97 | 42.86 | CTTTCACCAGTCTAATCATGC |
|            | TRINITY_DN17275_c1_g1_i5  | REVERSE     | 55.28 | 38.1  | TAGAAAGATTGTGGCAGAAGA |
| Primer-7   | TRINITY_DN17285_c1_g11_i1 | FORWARD     | 55.93 | 42.86 | CTTTGACGATACTGACGAATG |
|            | TRINITY_DN17285_c1_g11_i1 | REVERSE     | 55.02 | 38.1  | TCATACAGCTCTTTTTCTTGC |
| Primer-8   | TRINITY_DN17266_c1_g4_i1  | FORWARD     | 55.13 | 33.33 | CTTTTTCTCAATCCTTCATT  |
|            | TRINITY_DN17266_c1_g4_i1  | REVERSE     | 55.26 | 47.62 | GAGAGGGATCTACGAGAAGAA |
| Primer-9   | TRINITY_DN17294_c2_g1_i1  | FORWARD     | 55.41 | 38.1  | AACAATGTTGGTGACACACTT |
|            | TRINITY_DN17294_c2_g1_i1  | REVERSE     | 54.58 | 38.1  | CATTATTTCTGACTGCTGTT  |
| Primer-10  | TRINITY_DN52428_c0_g1_i1  | FORWARD     | 54.91 | 38.1  | ATTATCCCTTATCCGATCTTG |
|            | TRINITY_DN52428_c0_g1_i1  | REVERSE     | 54.5  | 38.1  | AACGTTGGTTAGTTCAGAATG |
| Primer-11  | TRINITY_DN17236_c3_g1_i1  | FORWARD     | 55.44 | 38.1  | TCCTCTTTTTGATAAGCCTTC |
|            | TRINITY_DN17236_c3_g1_i1  | REVERSE     | 54.83 | 42.86 | TACCCAACCACAATATACAC  |
| Primer-12  | TRINITY_DN17233_c0_g1_i5  | FORWARD     | 55.81 | 33.33 | ACGACAACAAAATCAGTTGAA |
|            | TRINITY_DN17233_c0_g1_i5  | REVERSE     | 54.67 | 33.33 | CAATAATAAAAGTGCGGTGTT |
| Primer-13  | TRINITY_DN52421_c0_g1_i1  | FORWARD     | 54.89 | 42.86 | AAGAAGGTGAAGAGAAGGAGA |
|            | TRINITY_DN52421_c0_g1_i1  | REVERSE     | 55.38 | 47.37 | AAACTCCTCACCACGATGT   |
| Primer-14  | TRINITY_DN17222_c1_g2_i4  | FORWARD     | 55.57 | 33.33 | ACTAAATGGTGCTTTGGTTTT |
|            | TRINITY_DN17222_c1_g2_i4  | REVERSE     | 55.16 | 38.1  | TCCTTGGACATAAAAGCTACA |
| Primer-15  | TRINITY_DN52408_c0_g1_i1  | FORWARD     | 55.1  | 47.62 | CAAGTAGCTAGTGATGGTTGG |
|            | TRINITY_DN52408_c0_g1_i1  | REVERSE     | 54.33 | 33.33 | TGAAAAACACTATTCCCATTC |
| Primer-16  | TRINITY_DN52473_c0_g1_i1  | FORWARD     | 55.15 | 40    | ATGCTCGTGCAAAGACTATT  |
|            | TRINITY_DN52473_c0_g1_i1  | REVERSE     | 54.94 | 38.1  | AGAGAGAAGGCAAATGAAGTT |
| Primer-17  | TRINITY_DN17236_c0_g1_i2  | FORWARD     | 55.39 | 38.1  | TGCAGGAAATGTAGAATTGTC |
|            | TRINITY_DN17236_c0_g1_i2  | REVERSE     | 55.29 | 52.38 | CTGCACTTCTACAGTGAGAG  |
| Primer-18  | TRINITY_DN17204_c0_g1_i1  | FORWARD     | 55.56 | 42.86 | GACAAATTCATCTGGAGTGTG |
|            | TRINITY_DN17204_c0_g1_i1  | REVERSE     | 54.89 | 38.1  | GGATATCATGGAGATGAACAA |
| Primer-19  | TRINITY_DN17266_c4_g3_i1  | FORWARD     | 54.82 | 42.86 | CTGACCCATTAAGATGTGAAG |
|            | TRINITY_DN17266_c4_g3_i1  | REVERSE     | 59.97 | 55.56 | GCTTCATCAGCAGCAGCA    |
| Primer-20  | TRINITY_DN17294_c2_g3_i3  | FORWARD     | 54.7  | 38.1  | TATGTTTAATGCTTCCCAGAG |
|            | TRINITY_DN17294_c2_g3_i3  | REVERSE     | 53.88 | 38.1  | GAGATTGCATCTGAAGCTTAT |
| Primer-21  | TRINITY_DN52456_c0_g1_i1  | FORWARD     | 55.15 | 38.1  | AAAGAACCAGCTCATAAATC  |
|            | TRINITY_DN52456_c0_g1_i1  | REVERSE     | 55.16 | 33.33 | AGCAAGAAAGGCTTGTTATTT |

|           |                          |         |       |       |                        |
|-----------|--------------------------|---------|-------|-------|------------------------|
| Primer-22 | TRINITY_DN52455_c0_g1_i1 | FORWARD | 55.32 | 42.86 | CTATCCAAGATCCAATCCTTC  |
|           | TRINITY_DN52455_c0_g1_i1 | REVERSE | 55.05 | 50    | CAGAAGAGATGGAAGACTGC   |
| Primer-23 | TRINITY_DN17244_c0_g1_i1 | FORWARD | 55.46 | 38.1  | CAAAGACTGTGTTTTGTTCGT  |
|           | TRINITY_DN17244_c0_g1_i1 | REVERSE | 54.99 | 42.86 | CTGAGCCGAAAACTAGTACA   |
| Primer-24 | TRINITY_DN17236_c0_g1_i4 | FORWARD | 54.73 | 31.82 | CCTTTCTATATGCAAACAATCA |
|           | TRINITY_DN17236_c0_g1_i4 | REVERSE | 54.63 | 38.1  | CAACACACATGTCTTCTTTGA  |
| Primer-25 | TRINITY_DN17204_c0_g1_i7 | FORWARD | 55.36 | 38.1  | TCGGATCCTAAAAGATACCAT  |
|           | TRINITY_DN17204_c0_g1_i7 | REVERSE | 53.49 | 38.1  | CAAGGAAGTTCCATATTGAGT  |
| Primer-26 | TRINITY_DN17238_c1_g1_i2 | FORWARD | 55.09 | 33.33 | GTTTCGATTTTTGTTAGGGTTT |
|           | TRINITY_DN17238_c1_g1_i2 | REVERSE | 55.33 | 42.86 | ATAGCTCACTGTTTCGCAGATA |
| Primer-27 | TRINITY_DN17210_c0_g3_i1 | FORWARD | 54.38 | 38.1  | TTCTTGTTGGATCTCTCATTCC |
|           | TRINITY_DN17210_c0_g3_i1 | REVERSE | 55.14 | 42.86 | GGTTTACCGAGTCAGAAGTTT  |
| Primer-28 | TRINITY_DN17222_c1_g3_i3 | FORWARD | 55.01 | 38.1  | AATGGAAATTGGAGTAAGAGG  |
|           | TRINITY_DN17222_c1_g3_i3 | REVERSE | 54.93 | 42.86 | AACACTCCAGGCATTGTAGTA  |
| Primer-29 | TRINITY_DN52476_c0_g1_i1 | FORWARD | 55.52 | 45    | ACGACTTCAGTTGAAACAGC   |
|           | TRINITY_DN52476_c0_g1_i1 | REVERSE | 55.31 | 42.86 | TCTTGAGATTTGTAGGTGTGG  |
| Primer-30 | TRINITY_DN17296_c0_g1_i1 | FORWARD | 55.81 | 36.36 | GCCATGCCATCATAGTTATATT |
|           | TRINITY_DN17296_c0_g1_i1 | REVERSE | 54.86 | 33.33 | AGGAATGGAGAAAGAAGAAAA  |
| Primer-31 | TRINITY_DN17216_c0_g1_i2 | FORWARD | 55    | 42.86 | ATGGTGTGGTAGAGTCAATG   |
|           | TRINITY_DN17216_c0_g1_i2 | REVERSE | 55.63 | 38.1  | ATGAAGATCTTTTCCACCATC  |
| Primer-32 | TRINITY_DN17217_c0_g2_i2 | FORWARD | 55.12 | 38.1  | CCTAATGCAATTAAGTCATGC  |
|           | TRINITY_DN17217_c0_g2_i2 | REVERSE | 54.39 | 42.86 | CACTGTACTGATGTCATGGAA  |
| Primer-33 | TRINITY_DN17204_c0_g1_i9 | FORWARD | 54.95 | 31.82 | TTGACAATGAGAAAGTGTGTTT |
|           | TRINITY_DN17204_c0_g1_i9 | REVERSE | 55.1  | 42.86 | GTCCGGTGCCTATATTTGTGA  |
| Primer-34 | TRINITY_DN17238_c2_g3_i1 | FORWARD | 54.69 | 33.33 | GAATTATTTAACCGCGTATGA  |
|           | TRINITY_DN17238_c2_g3_i1 | REVERSE | 53.89 | 33.33 | AACATTTACCGTTAAACTCG   |
| Primer-35 | TRINITY_DN17294_c2_g3_i3 | FORWARD | 55.59 | 38.1  | CAGCACAATCAGCAATCTAAT  |
|           | TRINITY_DN17294_c2_g3_i3 | REVERSE | 55.26 | 38.1  | ATATTGACTGTTGAGCCATTG  |
| Primer-36 | TRINITY_DN17218_c0_g1_i1 | FORWARD | 55.1  | 33.33 | TAGATTGCTTTGTGGGAATAA  |
|           | TRINITY_DN17218_c0_g1_i1 | REVERSE | 55.04 | 33.33 | AGAAAGCTTTTCCTTGTTTGT  |
| Primer-37 | TRINITY_DN17282_c1_g5_i1 | FORWARD | 55.42 | 42.86 | GAGGAAGAATTCAGTTTGGAC  |
|           | TRINITY_DN17282_c1_g5_i1 | REVERSE | 54.94 | 38.1  | TGCACACAAATGTTAGTTACG  |
| Primer-38 | TRINITY_DN17242_c2_g1_i2 | FORWARD | 55.02 | 33.33 | TATTGAAGCTGGAATCCATAA  |
|           | TRINITY_DN17242_c2_g1_i2 | REVERSE | 52.03 | 42.86 | TACTCAAGGTCTGAACATAGG  |
| Primer-39 | TRINITY_DN52433_c0_g1_i1 | FORWARD | 55.03 | 38.1  | ACTTTCTCAACAATCCCTTTC  |
|           | TRINITY_DN52433_c0_g1_i1 | REVERSE | 55.32 | 33.33 | GCCAATCATAAAAGACAATCA  |
| Primer-40 | TRINITY_DN17296_c0_g1_i1 | FORWARD | 54.72 | 38.1  | CAATATTGTGCCTATTCATCC  |
|           | TRINITY_DN17296_c0_g1_i1 | REVERSE | 55.03 | 38.1  | GCAACATAGCATTTGGTAAAC  |
| Primer-   | TRINITY_DN17296_c0_g1_i1 | FORWARD | 55.39 | 38.1  | TGCAGGAAATGTAGAATTGTC  |

|           |                           |         |       |       |                        |  |
|-----------|---------------------------|---------|-------|-------|------------------------|--|
| 41        |                           |         |       |       |                        |  |
| Primer-42 | TRINITY_DN17296_c0_g1_i1  | REVERSE | 55.29 | 52.38 | CTGCACTTCCTACAGTGAGAG  |  |
|           | TRINITY_DN17272_c0_g4_i1  | FORWARD | 55.13 | 38.1  | ACTCCAACACAAGATCAAATG  |  |
|           | TRINITY_DN17272_c0_g4_i1  | REVERSE | 55.07 | 42.86 | ATACTGGAAAGAAAGGTCCAG  |  |
| Primer-43 | TRINITY_DN17239_c0_g2_i7  | FORWARD | 54.2  | 38.1  | AAACATTAGCAGGTACTTGGA  |  |
|           | TRINITY_DN17239_c0_g2_i7  | REVERSE | 55.05 | 42.86 | CAGTTAGTTGAAGATGCCAAC  |  |
| Primer-44 | TRINITY_DN17238_c2_g5_i1  | FORWARD | 54.79 | 42.86 | GTAATGTGTTCCCGTACAAG   |  |
|           | TRINITY_DN17238_c2_g5_i1  | REVERSE | 54.74 | 38.1  | ATGTTCAAGAGATGAGACAA   |  |
| Primer-45 | TRINITY_DN17218_c0_g1_i1  | FORWARD | 55    | 38.1  | GAAGAAGATGATGATGATGGA  |  |
|           | TRINITY_DN17218_c0_g1_i1  | REVERSE | 55.04 | 33.33 | AGAAAGCTTTTCCTTGT      |  |
| Primer-46 | TRINITY_DN17204_c0_g2_i1  | FORWARD | 54.67 | 38.1  | CGTGTATGATGATGAATAGCA  |  |
|           | TRINITY_DN17204_c0_g2_i1  | REVERSE | 55.18 | 33.33 | TTTTGCAGTCAAACCTCTCAT  |  |
| Primer-47 | TRINITY_DN17228_c0_g1_i3  | FORWARD | 54.21 | 42.86 | CTCCTACGAATACCGTAATG   |  |
|           | TRINITY_DN17228_c0_g1_i3  | REVERSE | 54.49 | 42.86 | TCCTGATTGCTACACTATTCC  |  |
| Primer-48 | TRINITY_DN17281_c0_g1_i7  | FORWARD | 55.36 | 36.36 | GCTCAGTATAGATGGCAATTTT |  |
|           | TRINITY_DN17281_c0_g1_i7  | REVERSE | 54.2  | 42.86 | CAATACAAGTCCAGAGATGGT  |  |
| Primer-49 | TRINITY_DN17251_c0_g1_i1  | FORWARD | 54.7  | 38.1  | CATTTCCAGCTAAACATCTA   |  |
|           | TRINITY_DN17251_c0_g1_i1  | REVERSE | 54.76 | 38.1  | GGAAGATATCAAAGTCCATT   |  |
| Primer-50 | TRINITY_DN17217_c0_g1_i5  | FORWARD | 55.05 | 38.1  | TCAAACAAAGCCTCAGTGTAT  |  |
|           | TRINITY_DN17217_c0_g1_i5  | REVERSE | 54.33 | 33.33 | TGTAAGAACATTCCATTCC    |  |
| Primer-51 | TRINITY_DN17259_c3_g1_i13 | FORWARD | 54.92 | 38.1  | ACTGACTGAACAGTTTTTCCA  |  |
|           | TRINITY_DN17259_c3_g1_i13 | REVERSE | 55.04 | 33.33 | GAGGGTTTGAATTTTCTTGTT  |  |
| Primer-52 | TRINITY_DN17272_c1_g1_i1  | FORWARD | 55.3  | 38.1  | ATGATCTCCTTTGGAACTGT   |  |
|           | TRINITY_DN17272_c1_g1_i1  | REVERSE | 55.15 | 38.1  | GGCTTAGATCCATCTTTTGTT  |  |
| Primer-53 | TRINITY_DN17210_c0_g3_i1  | FORWARD | 54.62 | 42.86 | GGAATAACGATGACAATGTTC  |  |
|           | TRINITY_DN17210_c0_g3_i1  | REVERSE | 55.2  | 33.33 | ACATCGAATCCATTTTCTAT   |  |
| Primer-54 | TRINITY_DN17207_c0_g2_i18 | FORWARD | 54.58 | 33.33 | TGATTCAATCCCAGTGTATTT  |  |
|           | TRINITY_DN17207_c0_g2_i18 | REVERSE | 54.38 | 38.1  | TCTTCCACCATCTCATCTTTC  |  |
| Primer-55 | TRINITY_DN52449_c0_g1_i1  | FORWARD | 54.94 | 38.1  | AGAGAAGAAGCCATTTTCAGT  |  |
|           | TRINITY_DN52449_c0_g1_i1  | REVERSE | 54.89 | 33.33 | ATACAAGGTAACATTGCCAAA  |  |

Polymorphic markers are highlighted.

**Additional file 18. Table S3.** Shortlisted genes with their primer sequences for validation through RT-PCR in tolerant vs sensitive combinations based on Log FC and FDR

| S. No | ID                    | Gene name                              | Primer name        | Primer sequence       |
|-------|-----------------------|----------------------------------------|--------------------|-----------------------|
| 1     | TRINITY_DN68508_c0_g1 | MTR_7g092380<br>MtrDRAFT_AC155881g12v1 | MTR_7g092380_F     | TCGCTTTGATTGCTTTGATG  |
|       |                       |                                        | MTR_7g092380_R     | CATATCACAACGCCGAAATG  |
| 2     | TRINITY_DN32858_c0_g1 | LOC101499292                           | LOC101499292_F     | TTCTCTCCAACACGGAGCTT  |
|       |                       |                                        | LOC101499292_R     | AGTCCAGGCATATCCAAACG  |
| 3     | TRINITY_DN74582_c1_g3 | MTR_4g114950                           | MTR_4g114950_F     | GAACACGTGGCTTGATGAG   |
|       |                       |                                        | MTR_4g114950_R     | GGGGTCAAGAATGGATCAG   |
| 4     | TRINITY_DN71099_c0_g1 | PHAVU_001G03970g                       | PHAVU_001G03970g_F | GCACCAACTGATGGACCTT   |
|       |                       |                                        | PHAVU_001G03970g_R | CGGCATATCGATCACAAAC   |
| 5     | TRINITY_DN60178_c0_g1 | MTR_2g014470<br>MtrDRAFT_AC158497g3v2  | MTR_2g014470_F     | TGCCTTCTTTTGAACAACC   |
|       |                       |                                        | MTR_2g014470_R     | GGAAACGAGCAACCAAATG   |
| 6     | TRINITY_DN68353_c0_g2 | MTR_3g086050                           | MTR_3g086050_F     | CTCAGAGCCATGACAGGTG   |
|       |                       |                                        | MTR_3g086050_R     | TGCAAATGGATCTTCCATC   |
| 7     | TRINITY_DN29122_c0_g2 | MTR_1g062190                           | MTR_1g062190_F     | ACCACTGGTTCGGTGCTTAC  |
|       |                       |                                        | MTR_1g062190_R     | AGCTCATCGGGAACCTGAG   |
| 8     | TRINITY_DN10549_c0_g1 | MTR_5g078040                           | MTR_5g078040_F     | GCCAAACAATCTCCTTTCCA  |
|       |                       |                                        | MTR_5g078040_R     | TGGGCAATCCTCCAATTTAC  |
| 9     | TRINITY_DN5198_c0_g1  | UGT73AC1                               | UGT73AC1_F         | TGTGCTGGTGTGCCTATGAT  |
|       |                       |                                        | UGT73AC1_R         | CTGCAAACCTCCACCTTCTCC |
| 10    | TRINITY_DN54817_c0_g1 | LOC101501134                           | LOC101501134_F     | TCGGTATGGTGAGGAAAAG   |
|       |                       |                                        | LOC101501134_R     | AGCACCGCCACTAACTCAA   |

**Additional file 19. Table S4.** Total Input reads, read mapped and mapping rate of transcriptome assembly.

| Properties          | Input Reads | Filtered Reads | Reads Mapped | Overall Read Mapping Rate | Aligned Pairs | Concordant Pair Alignment Rate |
|---------------------|-------------|----------------|--------------|---------------------------|---------------|--------------------------------|
| Tolerant-Treated_1  | 22536460    | 22530924       | 19719402     | 87.52%                    | 21064767      | 82.90%                         |
| Tolerant-Treated_2  | 24355081    | 24354870       | 21310695     | 87.50%                    | 20241302      | 82.90%                         |
| Tolerant-Treated_3  | 23604075    | 23600914       | 20653565     | 87.51%                    | 19623949      | 82.90%                         |
| Sensitive-Treated_1 | 26210135    | 26209794       | 22409665     | 85.50%                    | 21249126      | 80.90%                         |
| Sensitive-Treated_2 | 22541528    | 22538749       | 19273006     | 85.51%                    | 20430391      | 80.90%                         |
| Sensitive-Treated_3 | 23960480    | 23957250       | 20486210     | 85.51%                    | 19404026      | 80.80%                         |
| Tolerant-Control_1  | 26685338    | 26683165       | 23322985     | 87.41%                    | 22118262      | 82.70%                         |
| Tolerant-Control_2  | 24935410    | 24933624       | 21818483     | 87.51%                    | 20719399      | 82.90%                         |
| Tolerant-Control_3  | 28521319    | 28520206       | 24899111     | 87.30%                    | 21486289      | 82.60%                         |
| Sensitive-Control_1 | 30210135    | 30208348       | 26313027     | 87.11%                    | 25001244      | 82.50%                         |
| Sensitive-Control_2 | 27960145    | 27968244       | 24381246     | 87.17%                    | 23163895      | 82.60%                         |
| Sensitive-Control_3 | 32460168    | 32454893       | 28078045     | 86.51%                    | 26462235      | 81.30%                         |

**Additional figure 20. Table S5.** Total number of SSRs, SNPs and InDels generated from different combinations

| Properties          | Total number of reads | Total number of SSRs | Total number of SNPs | Total number of InDels |
|---------------------|-----------------------|----------------------|----------------------|------------------------|
| Tolerant- Treated_1 | 25355081              | 10474                | 17637                | 645                    |
| Tolerant- Treated_2 | 24355081              | 10214                | 16941                | 615                    |
| Tolerant- Treated_3 | 23605081              | 10013                | 16752                | 606                    |
| Sensitive-Treated_1 | 26210135              | 11275                | 17842                | 683                    |
| Sensitive-Treated_2 | 25210135              | 10928                | 17218                | 636                    |
| Sensitive-Treated_3 | 23960135              | 10678                | 16442                | 597                    |
| Tolerant-Control_1  | 26685338              | 11236                | 17475                | 663                    |
| Tolerant-Control_2  | 24935338              | 10348                | 17076                | 633                    |
| Tolerant-Control_3  | 25935338              | 10925                | 17120                | 627                    |
| Sensitive-Control_1 | 30210135              | 19167                | 13306                | 574                    |
| Sensitive-Control_2 | 27960145              | 11929                | 12715                | 552                    |
| Sensitive-Control_3 | 32460145              | 13863                | 13654                | 557                    |

**Additional file 21. Table S6:** Major allelic frequency, number of alleles, genetic diversity, PIC and heterozygosity of 18 polymorphic g-SSRs

| Marker | Major.Allele.Frqency | AlleleNo | GeneDiversity | Heterozygosity | PIC    |
|--------|----------------------|----------|---------------|----------------|--------|
| p_13   | 0.8854               | 3.0000   | 0.2081        | 0.0000         | 0.1957 |
| p_15   | 0.8333               | 3.0000   | 0.2908        | 0.0000         | 0.2702 |
| P_18   | 0.7396               | 3.0000   | 0.4178        | 0.0000         | 0.3786 |
| p_4    | 0.8542               | 3.0000   | 0.2598        | 0.0000         | 0.2442 |
| p_8    | 0.5521               | 3.0000   | 0.5662        | 0.0000         | 0.4850 |
| P_31   | 0.9271               | 3.0000   | 0.1365        | 0.0000         | 0.1296 |
| p_39   | 0.6771               | 5.0000   | 0.5048        | 0.0000         | 0.4705 |
| p_40   | 0.6146               | 4.0000   | 0.5276        | 0.0208         | 0.4554 |
| p_3    | 0.9167               | 3.0000   | 0.1554        | 0.0000         | 0.1481 |
| p_44   | 0.8021               | 3.0000   | 0.3305        | 0.0000         | 0.2968 |
| p_27   | 0.9063               | 3.0000   | 0.1743        | 0.0000         | 0.1669 |
| P_10   | 0.2917               | 10.0000  | 0.8461        | 0.1042         | 0.8304 |
| P_11   | 0.7083               | 4.0000   | 0.4568        | 0.0000         | 0.4148 |
| P_29   | 0.5625               | 6.0000   | 0.6357        | 0.1250         | 0.6039 |
| P_30   | 0.8438               | 5.0000   | 0.2787        | 0.0313         | 0.2653 |
| p_26   | 0.8073               | 4.0000   | 0.3215        | 0.0208         | 0.2866 |
| p_53   | 0.6406               | 7.0000   | 0.5652        | 0.0208         | 0.5447 |
| p_55   | 0.6042               | 5.0000   | 0.5653        | 0.0000         | 0.5124 |
| p_28   | 0.7083               | 4.0000   | 0.4464        | 0.0000         | 0.3940 |
| Mean   | 0.7303               | 4.2632   | 0.4046        | 0.0170         | 0.3733 |

**Additional file 22. Excel sheet:** EdgeR data file containing all the transcripts, annotations and their corresponding fold change values for the three combinations.
